# Supplementary material for: Stochastic De-repression of Rhodopsins in Single Photoreceptors of the Fly Retina
Source: PubMed Central journal article supplement (PMC3271025; doi:10.1371/journal.pcbi.1002357), 2012-02-02
Supplement: pcbi.1002357.s006.pdf [file pcbi.1002357.s006.pdf]

**Table S1. Results of Kolmogorov-Smirnov Tests for PR-specific Repression or De-repression**

| PR comparisons                       |                           | Rh3  |      |      |      | Rh5 |     |      |      | Rh6  |      |       |      | Phal |     |     |     |
|--------------------------------------|---------------------------|------|------|------|------|-----|-----|------|------|------|------|-------|------|------|-----|-----|-----|
|                                      |                           | 0w   | 1w   | 2w   | 4w   | 0w  | 1w  | 2w   | 4w   | 0w   | 1w   | 2w    | 4w   | 0w   | 1w  | 2w  | 4w  |
| One-sided<br>(for<br>repression)     | PR1 vs Others             | 1    | 0.0  | 0.1  | 0.0  | 0.0 | 0.3 | 0.0  | 0.1  | 0.1  | 0.0  | 0.0   | 0.0  | 0.9  | 0.5 | 0.4 | 0.3 |
|                                      | PR2 vs Others             | 1.2  | 0.0  | 0.1  | 1.0  | 0.2 | 0.1 | 0.7  | 0.1  | 6.1  | 5.0  | 13.5  | 5.3  | 2.8  | 0.2 | 6.0 | 0.1 |
|                                      | PR3 vs Others             | 74.9 | 15.8 | 38.9 | 32.1 | 1.9 | 1.1 | 17.5 | 26.8 | 0.3  | 0.4  | 0.1   | 0.4  | 0.5  | 1.4 | 0.3 | 4.7 |
|                                      | PR4 vs Others             | 8.2  | 3.8  | 5.8  | 2.9  | 1.3 | 0.5 | 0.4  | 0.0  | 8.8  | 6.9  | 29.0  | 23.9 | 0.2  | 0.3 | 0.0 | 1.2 |
|                                      | PR5 vs Others             | 0.8  | 1.8  | 0.1  | 0.1  | 0.1 | 0.3 | 0.3  | 0.0  | 12.7 | 3.5  | 38.4  | 7.2  | 3.2  | 1.6 | 3.3 | 0.0 |
|                                      | PR6 vs Others             | 0.0  | 0.0  | 0.0  | 0.0  | 1.8 | 0.0 | 0.0  | 0.2  | 0.1  | 0.0  | 0.1   | 0.1  | 1.2  | 0.2 | 0.0 | 0.5 |
| One-sided<br>(for de-<br>repression) | PR1 vs Others             | 20.2 | 5.7  | 2.6  | 22.6 | 6.8 | 0.6 | 2.5  | 0.2  | 16.5 | 5.4  | 16.4  | 19.8 | 0.8  | 0.8 | 1.3 | 0.7 |
|                                      | PR2 vs Others             | 5.0  | 4.6  | 7.9  | 0.0  | 0.3 | 0.4 | 2.3  | 2.0  | 0.0  | 0.0  | 0.2   | 0.0  | 0.0  | 0.3 | 0.0 | 1.0 |
|                                      | PR3 vs Others             | 0.0  | 0.0  | 0.0  | 0.0  | 0.0 | 0.0 | 0.0  | 0.0  | 6.9  | 3.0  | 43.5  | 8.0  | 2.9  | 0.0 | 2.3 | 0.0 |
|                                      | PR4 vs Others             | 0.5  | 0.2  | 0.5  | 0.1  | 0.1 | 0.1 | 0.4  | 7.3  | 0.0  | 0.0  | 0.0   | 0.0  | 2.6  | 0.5 | 1.2 | 0.1 |
|                                      | PR5 vs Others             | 0.2  | 0.0  | 1.1  | 0.6  | 0.5 | 0.4 | 0.2  | 1.1  | 0.4  | 0.3  | 0.0   | 0.8  | 0.6  | 0.4 | 0.0 | 3.0 |
|                                      | PR6 vs Others             | 14.7 | 3.7  | 5.8  | 7.6  | 0.1 | 0.8 | 7.7  | 0.7  | 2.6  | 4.0  | 19.2  | 12.1 | 0.9  | 0.3 | 4.3 | 2.7 |
| One-sided<br>(for<br>repression)     | PRs 2,4,5 vs PRs<br>1,3,6 | 5.9  | 0.9  | 0.3  | 3.6  | 1.2 | 0.1 | 1.3  | 0.0  | 32.1 | 16.7 | 118.5 | 47.9 | 3.0  | 0.1 | 5.7 | 0.3 |
| One-sided<br>(for<br>repression)     | PRs 3,4 vs PRs 2,5        | 28.7 | 7.1  | 21.4 | 9.6  | 1.1 | 0.8 | 5.6  | 5.1  | 0.3  | 0.7  | 0.1   | 0.9  | 0.2  | 0.8 | 0.1 | 5.2 |
|                                      | PRs 2,5 vs PRs 1, 6       | 10.9 | 2.1  | 0.4  | 13.6 | 1.7 | 0.4 | 4.9  | 0.0  | 19.8 | 11.2 | 66.6  | 31.0 | 3.8  | 0.9 | 8.7 | 0.5 |
